# Supplementary material
Source: Preprints.org preprint supplement (doi:10.20944/preprints201912.0230.v2)
Supplement: Supplementary file 1 [file supplementary]

## Supplementary material

Table S1. Monthly Kanban System for September

| No. Kanban | Daily demand | Pieces of a Kanban for a C-Section | EPEC | Supplying units | Inventory security hours | Lockers Qty. | Cards Qty. |
|------------|--------------|------------------------------------|------|-----------------|--------------------------|--------------|------------|
| Lot a      | 4            | 1                                  | 1.5  | 6               | 1.50                     | 6            | 24         |
| Lot b      | 12           | 3                                  | 1.5  | 18              | 4.50                     | 6            | 24         |
| Lot c      | 12           | 3                                  | 1.5  | 18              | 4.50                     | 6            | 24         |

Note: EPEC (Every Product Every Cycle)

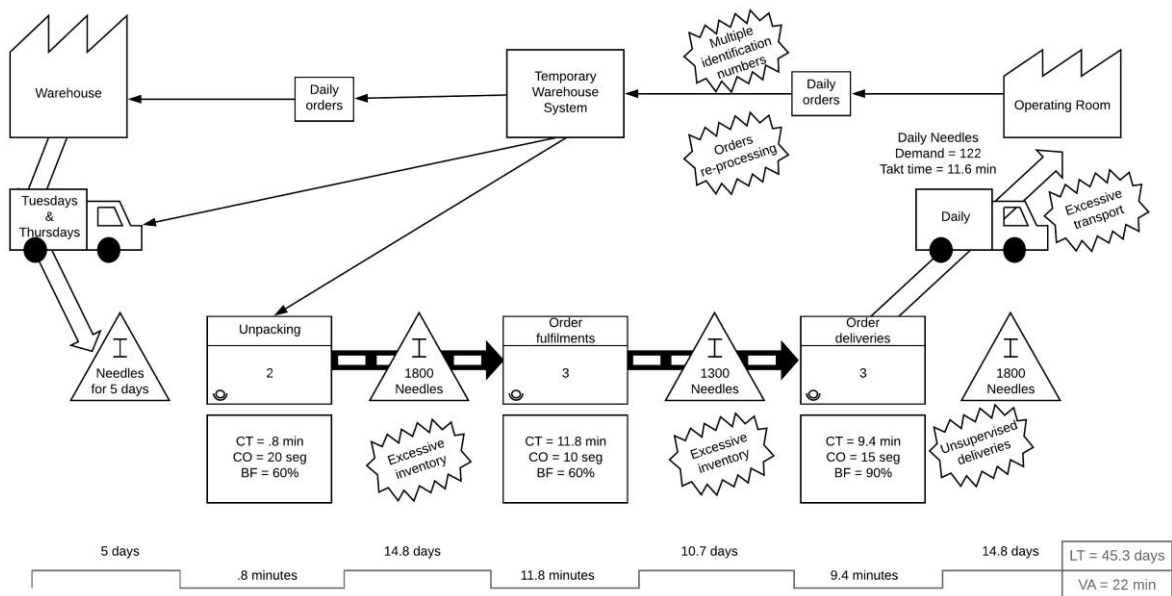

Figure S1. Value Stream Map (actual situation) for needles supplies from TW to the OR

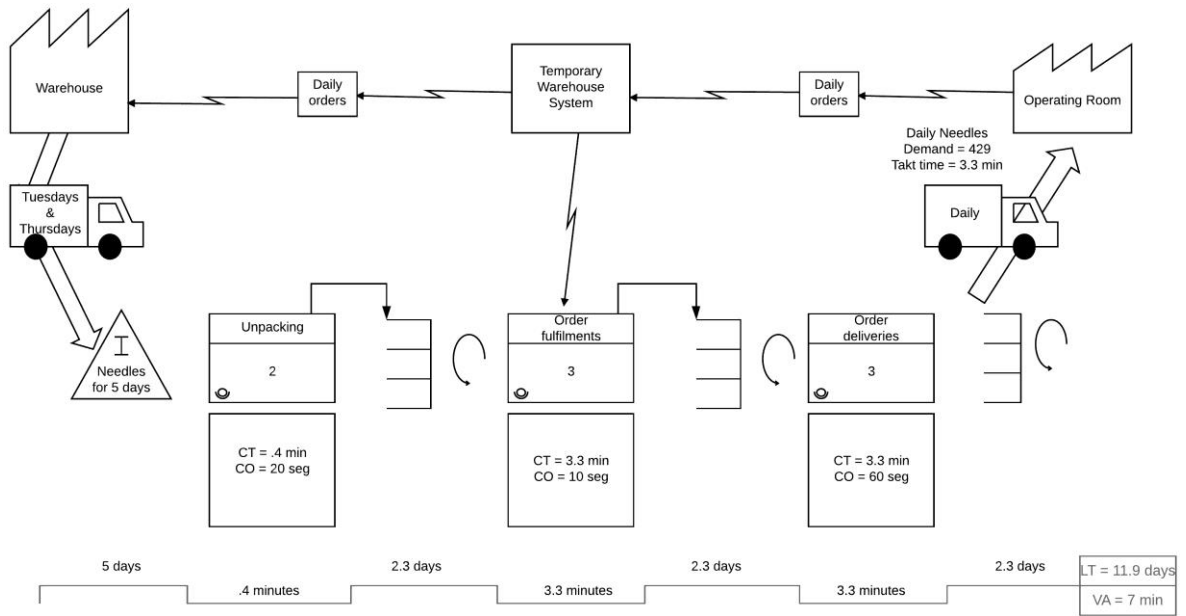

Figure S2. Value Stream Map (future) for needle supplies from TW to the OR

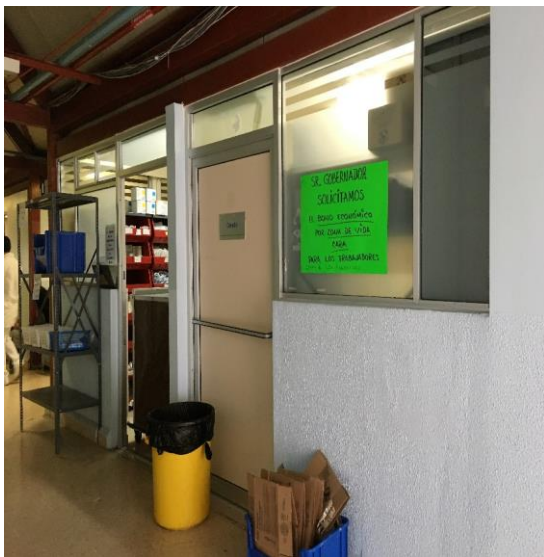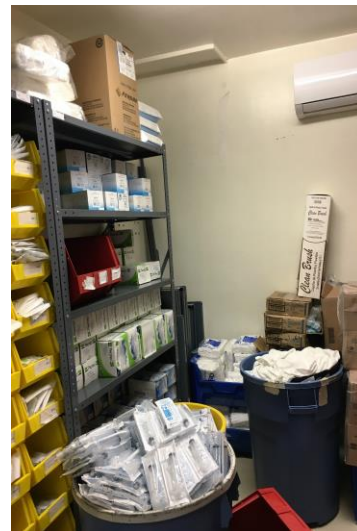

Figure S3. Before implementing the 5'S program in the TW.

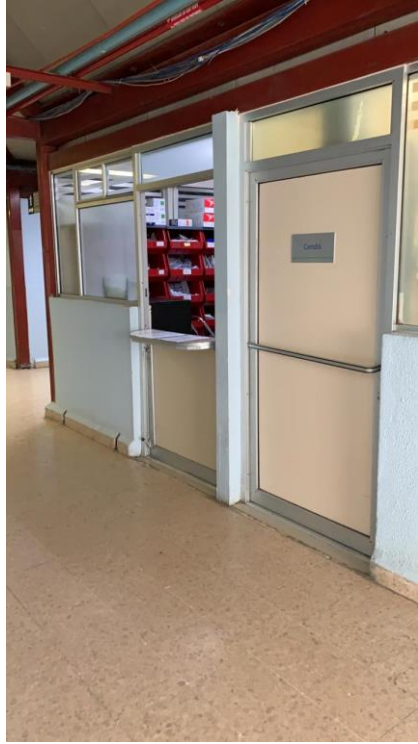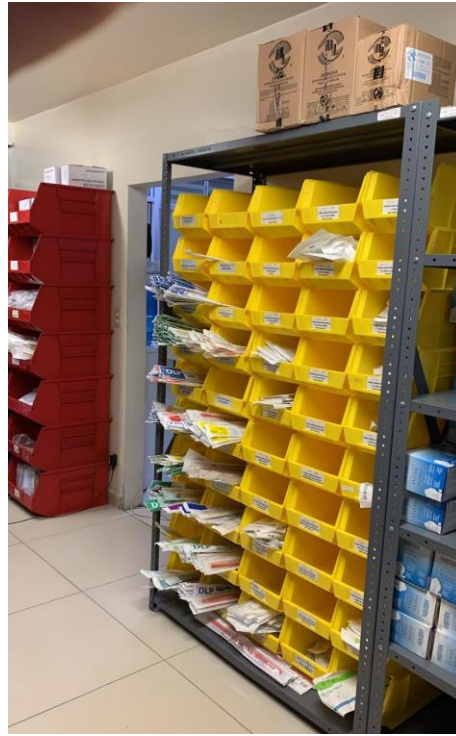

**Figure S4.** After implementing the 5'S program in the TW.
